# Supplementary material
Source: MDPI journal article supplement (https://www.mdpi.com/2076-3263/13/8/220)
Supplement: s1 [file s1]

## Supplementary materials

### Section S1

The seismicity parameters as well as the Gutenberg-Richter parameters normalized to 1 million km<sup>2</sup> used for the seismic source models SM1, SM2 and SM3F are summarized here.

**Table S1.** Seismicity parameters for seismic source zones of SM1.

| Zones    | a               | b               | Mmax      | H (kms)    | Source type     |
|----------|-----------------|-----------------|-----------|------------|-----------------|
| Z1+Z2+Z3 | 5.5116 ± 0.1077 | 1.0224 ± 0.0196 | 7.0 – 7.5 | 2.0 – 10.0 | Crustal         |
| Z4+Z5    | 5.2059 ± 0.1287 | 1.0295 ± 0.0129 | 7.0 – 7.5 | 2.0 – 10.0 | Crustal         |
| Z6       | 4.7341 ± 0.3354 | 0.9733 ± 0.0999 | 7.0 – 7.5 | 2.0 – 10.0 | Crustal         |
| Z7       | 5.4183 ± 0.1493 | 0.9796 ± 0.009  | 7.0 – 7.5 | 2.0 – 10.0 | Crustal         |
| Z8       | 5.2671 ± 0.2869 | 1.0021 ± 0.0979 | 7.0 – 7.5 | 2.0 – 10.0 | Crustal         |
| Z9       | 5.9555 ± 0.1179 | 0.9969 ± 0.0760 | 8.5 – 9.0 | 2.0 – 20.0 | Subduction like |
| Z10      | 6.2388 ± 0.1152 | 1.0090 ± 0.0734 | 8.5 – 9.0 | 2.0 – 20.0 | Subduction like |
| Z11      | 5.4916 ± 0.1032 | 0.8740 ± 0.0639 | 8.5 – 9.0 | 2.0 – 20.0 | Subduction like |
| Z12      | 5.4179 ± 0.1364 | 0.8698 ± 0.0704 | 8.5 – 9.0 | 2.0 – 20.0 | Subduction like |
| Z13      | 6.0514 ± 0.1481 | 1.0171 ± 0.0897 | 8.5 – 9.0 | 2.0 – 20.0 | Subduction like |
| Z14      | 5.8445 ± 0.1308 | 0.9825 ± 0.0784 | 8.5 – 9.0 | 2.0 – 20.0 | Subduction like |
| Z15      | 5.7769 ± 0.1349 | 0.9870 ± 0.0831 | 8.5 – 9.0 | 2.0 – 20.0 | Subduction like |
| Z16      | 6.0788 ± 0.0918 | 0.9552 ± 0.0574 | 8.5 – 9.0 | 2.0 – 20.0 | Subduction like |
| Z17      | 5.6305 ± 0.1174 | 0.8703 ± 0.0586 | 8.5 – 9.0 | 2.0 – 20.0 | Subduction like |
| Z18      | 5.8247 ± 0.1354 | 0.9611 ± 0.0728 | 8.5 – 9.0 | 2.0 – 20.0 | Subduction like |
| Z19      | 5.5197 ± 0.1963 | 1.0066 ± 0.0955 | 6.5 – 7.0 | 2.0 – 30.0 | Crustal         |
| Z20      | 5.6088 ± 0.1571 | 1.0121 ± 0.0907 | 6.5 – 7.0 | 2.0 – 30.0 | Crustal         |
| Z21      | 5.6735 ± 0.2089 | 1.0341 ± 0.0962 | 6.5 – 7.0 | 2.0 – 30.0 | Crustal         |
| Z22      | 5.9706 ± 0.1168 | 1.0122 ± 0.0700 | 6.5 – 7.0 | 2.0 – 30.0 | Crustal         |
| Z23      | 5.9224 ± 0.1117 | 1.0288 ± 0.0763 | 6.5 – 7.0 | 2.0 – 30.0 | Crustal         |
| Z24      | 4.4420 ± 0.0939 | 0.9716 ± 0.0157 | 7.0 – 7.5 | 2.0 – 20.0 | Crustal         |

\*Gutenberg-Richter parameter (a-parameter) normalized to 1 million km<sup>2</sup>

**Table S2.** Seismicity parameters for seismic source zones of SM2.

| Zones | a               | b               | Mmax      | H (kms)    | Source type     |
|-------|-----------------|-----------------|-----------|------------|-----------------|
| S1    | 4.6205 ± 0.1064 | 1.0118 ± 0.0229 | 7.0 – 7.5 | 2.0 – 10.0 | Crustal         |
| S2    | 4.9875 ± 0.121  | 0.9431 ± 0.0284 | 7.0 – 7.5 | 2.0 – 10.0 | Crustal         |
| S3    | 5.5022 ± 0.1715 | 1.0161 ± 0.0944 | 6.5 – 7.0 | 2.0 – 10.0 | Crustal         |
| S4    | 5.8141 ± 0.1560 | 1.0140 ± 0.0908 | 6.5 – 7.0 | 2.0 – 10.0 | Crustal         |
| S5    | 5.3073 ± 0.1835 | 1.0340 ± 0.0951 | 6.5 – 7.0 | 2.0 – 10.0 | Crustal         |
| S6    | 5.6711 ± 0.0868 | 0.8950 ± 0.0191 | 8.2 – 8.5 | 2.0 – 20.0 | Subduction like |
| S7    | 6.0245 ± 0.1097 | 0.9893 ± 0.0732 | 7.5 – 8.0 | 2.0 – 20.0 | Subduction like |
| S8    | 6.0960 ± 0.0952 | 0.9062 ± 0.0573 | 7.5 – 8.0 | 2.0 – 20.0 | Subduction like |
| S9    | 5.8626 ± 0.1168 | 0.9196 ± 0.0677 | 7.5 – 8.0 | 2.0 – 20.0 | Subduction like |
| S10   | 5.7008 ± 0.1190 | 0.9215 ± 0.0799 | 7.5 – 8.0 | 2.0 – 20.0 | Subduction like |
| S11   | 5.9643 ± 0.0858 | 0.9945 ± 0.0189 | 7.0 – 7.5 | 2.0 – 30.0 | Crustal         |
| S12   | 5.5969 ± 0.1786 | 1.0251 ± 0.0931 | 7.0 – 7.5 | 2.0 – 30.0 | Crustal         |
| S13   | 5.7108 ± 0.1609 | 0.9947 ± 0.0918 | 7.0 – 7.5 | 2.0 – 30.0 | Crustal         |
| S14   | 5.7029 ± 0.1591 | 1.0410 ± 0.0874 | 8.5 – 9.0 | 2.0 – 30.0 | Subduction like |
| S15   | 5.3592 ± 0.1000 | 0.8685 ± 0.0604 | 8.5 – 9.0 | 2.0 – 30.0 | Subduction like |
| S16   | 5.4728 ± 0.1478 | 0.9537 ± 0.0815 | 8.5 – 9.0 | 2.0 – 30.0 | Subduction like |
| S17   | 5.6933 ± 0.1182 | 0.9792 ± 0.0764 | 7.0 – 7.5 | 2.0 – 30.0 | Crustal         |
| S18   | 5.4921 ± 0.1241 | 0.9818 ± 0.0843 | 7.0 – 7.5 | 2.0 – 30.0 | Crustal         |
| S19   | 5.8892 ± 0.1505 | 1.0594 ± 0.0903 | 7.0 – 7.5 | 2.0 – 30.0 | Crustal         |

\*Gutenberg-Richter parameter (a-parameter) normalized to 1 million km<sup>2</sup>

**Table S3.** Seismicity parameters for seismic source zones of SM3F.

| Zones     | a                   | b                   | Mmax      | H (kms)    | Source type     |
|-----------|---------------------|---------------------|-----------|------------|-----------------|
| NPL_NORTH | $5.4714 \pm 0.0502$ | $0.9016 \pm 0.0109$ | 8.0       | 2.0 – 30.0 | Subduction like |
| NPL_SOUTH | $4.8287 \pm 0.0930$ | $0.9867 \pm 0.0203$ | 7.0 – 7.5 | 2.0 – 10.0 | Crustal         |

\*Gutenberg-Richter parameter (a-parameter) normalized to 1 million km<sup>2</sup>

## Section S2

Here are presented supplementary data regarding the distribution of the epicentral location sources (**Figure S1**) and the completeness analysis for the range of magnitude considered in the study (**Figure S2**).

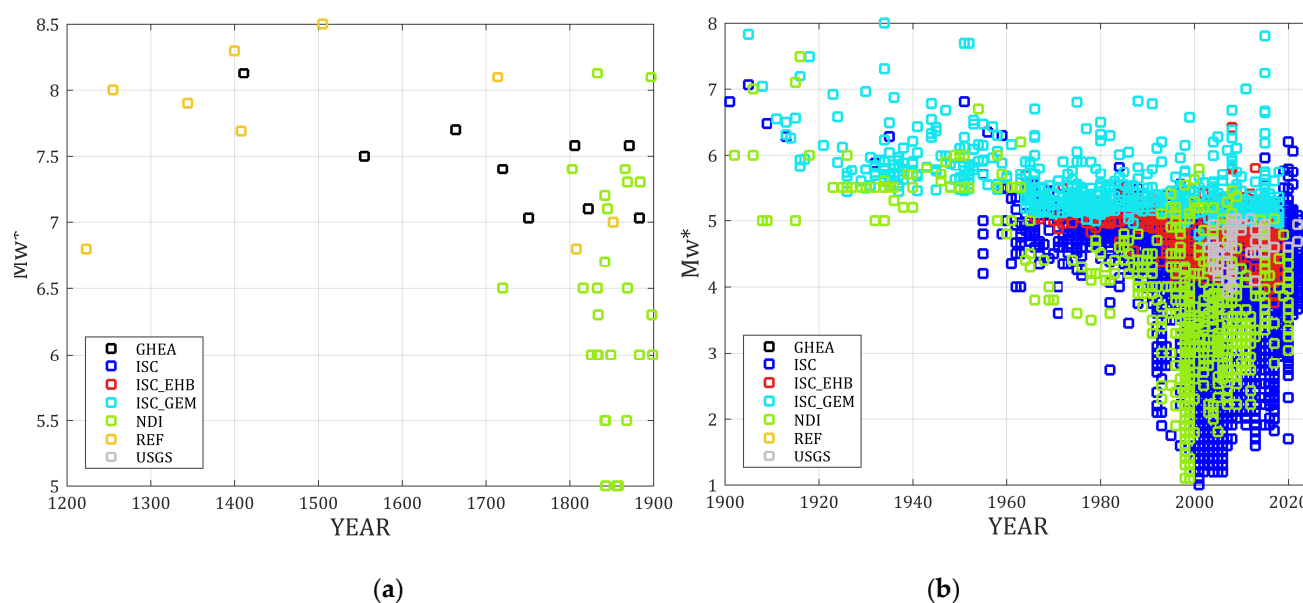

**Figure S1.** Distribution of epicentral location sources through different time periods of history. (a) up to year 1900; (b) after year 1900.

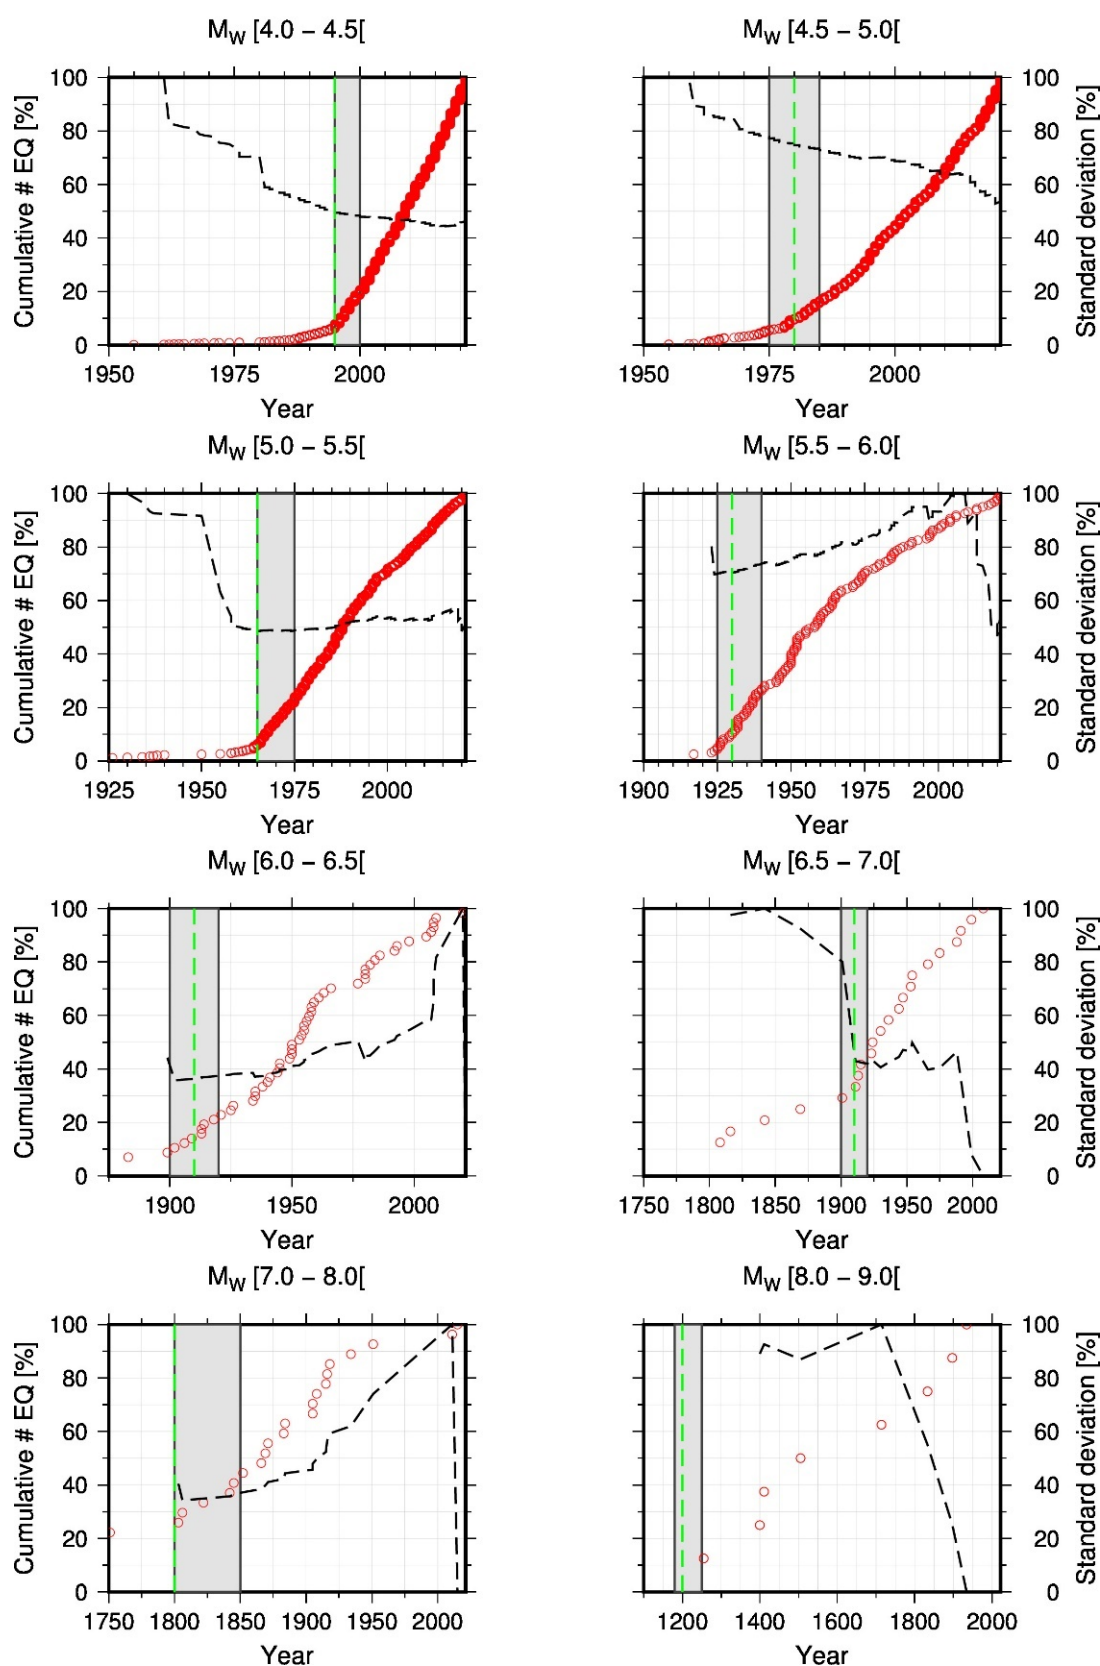

**Figure S2.** Completeness analysis, cumulative number of earthquakes as a function of time (red circles), inter-event variance (black dashed line), best-estimate is shown as green dashed line, gray shade represents the lower to upper estimates
